# Supplementary material
Source: publisher figshare collection journal article supplement (https://frontiersin.figshare.com/ndownloader/files/24997223)
Supplement: Supplementary file [file 24997223]

# Supplementary Table 1

|                                              | Dark        | Light (control) | Dark vs Light |
|----------------------------------------------|-------------|-----------------|---------------|
| <b>Full capsules mass (mg)*</b>              | 165.7 ± 8.8 | 134.1 ± 5.1     | 23.56%        |
| <b>Seed mass per capsule (mg)*</b>           | 92.5 ± 6.0  | 61.5 ± 5.3      | 50.41%        |
| <b>Seed mass average on 50 seeds (µg)*</b>   | 49 ± 3.8    | 34.7 ± 2.1      | 41.21%        |
| <b>Empty capsules mass (mg)<sup>NS</sup></b> | 69.7 ± 4.5  | 68.3 ± 3.2      | 2.05%         |
| <b>Seed length (µm)*</b>                     | 996 ± 48    | 786 ± 51        | 26.70%        |
| <b>Seed width (µm)*</b>                      | 720 ± 51    | 541 ± 46        | 33.16%        |
| <b>Germinability 30 DPA (%)*</b>             | 80 ± 1      | 16.3 ± 0.58     | 500           |
| <b>Germinability 90 DPA (%)*</b>             | 92 ± 1      | 93.4 ± 1.5      | -1.39         |

**Sup. Table 1. Measurements of etiolated capsules, their seeds and comparison with controls. Data were expressed as mean ± SD on 9 capsules from 3 different plants.** P values indicate statistical significance for a given measurement between etiolated and control capsules. NS, Not Significant; Symbol \* indicates a p-value < 0.0001 between etiolated and control capsules for a given parameter.
